# Supplementary material for: Alda-1 is an agonist and chemical chaperone for the common human aldehyde dehydrogenase 2 variant
Source: Springer Nature journal article supplement (doi:10.1038/nsmb.1737), 2010-01-10
Supplement: 41594_2010_BFnsmb1737_MOESM7_ESM.pdf [file 41594_2010_BFnsmb1737_MOESM7_ESM.pdf]

## Alda-1 is an agonist and chemical chaperone for the common human aldehyde dehydrogenase 2 variant

Samantha Perez-Miller, Hina Younus, Ram Vanam, Che-Hong Chen, Daria Mochly-Rosen and Thomas D. Hurley

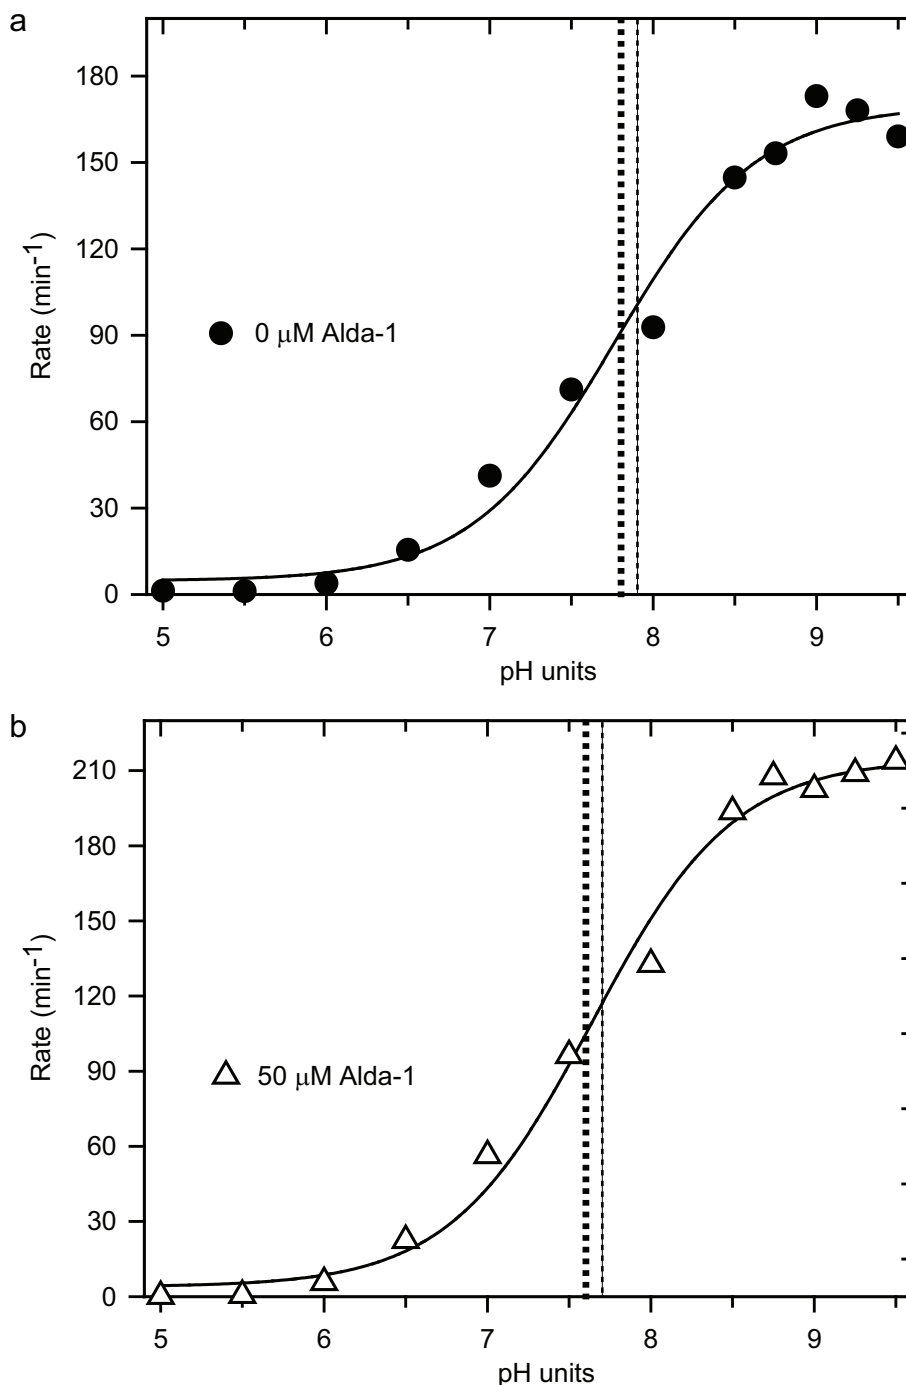

**Supplementary Figure 1** Dependence of ALDH2-catalyzed hydrolysis of *para*-nitrophenylacetate on pH. The rate of nitrophenol formation by ALDH2-catalyzed hydrolysis of *para*-nitrophenylacetate was monitored as a function of pH in the absence (a) and presence (b) of 50 μM Alda-1. In each panel, the apparent pKa values for ester hydrolysis are indicated by the dashed vertical lines (pKa = 7.8 in the absence of Alda-1 and pKa = 7.6 in the presence of Alda-1).
